# Supplementary material
Source: publisher figshare collection journal article supplement (https://tandf.figshare.com/ndownloader/files/30926665)
Supplement: Supplementary file 2 [file 30926665]

# Dependency Report

The Dependency Report shows dependencies among MATLAB files in a folder ([Learn More](#)).

Rerun This Report

Run Report on Current Folder

☐ Show child functions ☐ Show parent functions (current folder only)

☐ Show subfunctions

Built-in functions and files in toolbox/matlab are not shown

Report for Folder C:\Users\thoma\Dropbox\Research\Functional Bounds\Code\Clean

| MATLAB File List                          | Children<br>(called functions)                                                                                                                                                                                                                                                                                                                                                                                                                                                        | Parents<br>(calling functions, current dir. only)                                                                                                                                 |
|-------------------------------------------|---------------------------------------------------------------------------------------------------------------------------------------------------------------------------------------------------------------------------------------------------------------------------------------------------------------------------------------------------------------------------------------------------------------------------------------------------------------------------------------|-----------------------------------------------------------------------------------------------------------------------------------------------------------------------------------|
| <a href="#">csv2mat_numeric</a>           |                                                                                                                                                                                                                                                                                                                                                                                                                                                                                       | r17_main_star                                                                                                                                                                     |
| <a href="#">gurobinprog</a>               | other : <a href="#">gurobi</a>                                                                                                                                                                                                                                                                                                                                                                                                                                                        | r17_parameters>r17_ate<br>r17_parameters>r17_corr<br>r17_parameters>r17_cp<br>r17_parameters>r17_jp<br>r17_parameters>r17_mp<br>r17_parameters>r17_var10<br>r17_parameters>r17_vc |
| <a href="#">r17_empdist</a>               | other : <a href="#">combinate_vec</a><br>other : <a href="#">permn</a>                                                                                                                                                                                                                                                                                                                                                                                                                | r17_parameters                                                                                                                                                                    |
| <a href="#">r17_main_star</a>             | toolbox : ? Multiple class<br>methods match <a href="#">kmeans.m</a><br>current dir : <a href="#">csv2mat_numeric</a><br>current dir : <a href="#">r17_parameters</a>                                                                                                                                                                                                                                                                                                                 |                                                                                                                                                                                   |
| <a href="#">r17_parameters</a>            | other : <a href="#">combinate_vec</a><br>other : ? Multiple class<br>methods match <a href="#">kron.m</a><br>other : <a href="#">permn</a><br>subfunction : <a href="#">r17_ate</a><br>subfunction : <a href="#">r17_corr</a><br>subfunction : <a href="#">r17_cp</a><br>current dir : <a href="#">r17_empdist</a><br>subfunction : <a href="#">r17_jp</a><br>subfunction : <a href="#">r17_mp</a><br>subfunction : <a href="#">r17_var10</a><br>subfunction : <a href="#">r17_vc</a> | r17_main_star                                                                                                                                                                     |
| <a href="#">r17_parameters&gt;r17_jp</a>  | current dir : <a href="#">gurobinprog</a><br>other : ? Multiple class<br>methods match <a href="#">kron.m</a><br>other : <a href="#">permn</a>                                                                                                                                                                                                                                                                                                                                        | r17_parameters                                                                                                                                                                    |
| <a href="#">r17_parameters&gt;r17_ate</a> | current dir : <a href="#">gurobinprog</a><br>other : ? Multiple class<br>methods match <a href="#">kron.m</a>                                                                                                                                                                                                                                                                                                                                                                         | r17_parameters                                                                                                                                                                    |

|                                             |                                                                                                                                                                                                                                                                            |                                                    |
|---------------------------------------------|----------------------------------------------------------------------------------------------------------------------------------------------------------------------------------------------------------------------------------------------------------------------------|----------------------------------------------------|
|                                             | other : <a href="#">permn</a>                                                                                                                                                                                                                                              |                                                    |
| <a href="#">r17_parameters&gt;r17_vc</a>    | current dir : <a href="#">gurobinprog</a><br>other : ? Multiple class<br>methods match <a href="#">kron.m</a><br>other : <a href="#">permn</a>                                                                                                                             | r17_parameters                                     |
| <a href="#">r17_parameters&gt;r17_cp</a>    | current dir : <a href="#">gurobinprog</a><br>other : ? Multiple class<br>methods match <a href="#">kron.m</a><br>other : <a href="#">permn</a>                                                                                                                             | r17_parameters                                     |
| <a href="#">r17_parameters&gt;r17_mp</a>    | current dir : <a href="#">gurobinprog</a><br>other : ? Multiple class<br>methods match <a href="#">kron.m</a><br>other : <a href="#">permn</a>                                                                                                                             | r17_parameters                                     |
| <a href="#">r17_parameters&gt;r17_corr</a>  | subfunction : <a href="#">corr_l</a><br>subfunction : <a href="#">corr_u</a><br>current dir : <a href="#">gurobinprog</a><br>unknown : <a href="#">knitromatlab</a><br>other : ? Multiple class<br>methods match <a href="#">kron.m</a><br>other : <a href="#">permn</a>   | r17_parameters                                     |
| <a href="#">r17_parameters&gt;corr_l</a>    |                                                                                                                                                                                                                                                                            | r17_parameters>corr_u<br>r17_parameters>r17_corr   |
| <a href="#">r17_parameters&gt;corr_u</a>    | subfunction : <a href="#">corr_l</a>                                                                                                                                                                                                                                       | r17_parameters>r17_corr                            |
| <a href="#">r17_parameters&gt;r17_var10</a> | current dir : <a href="#">gurobinprog</a><br>unknown : <a href="#">knitromatlab</a><br>other : ? Multiple class<br>methods match <a href="#">kron.m</a><br>other : <a href="#">permn</a><br>subfunction : <a href="#">var10_l</a><br>subfunction : <a href="#">var10_u</a> | r17_parameters                                     |
| <a href="#">r17_parameters&gt;var10_l</a>   |                                                                                                                                                                                                                                                                            | r17_parameters>r17_var10<br>r17_parameters>var10_u |
| <a href="#">r17_parameters&gt;var10_u</a>   | subfunction : <a href="#">var10_l</a>                                                                                                                                                                                                                                      | r17_parameters>r17_var10                           |
